# Supplementary material
Source: MDPI journal article supplement (https://www.mdpi.com/2071-1050/7/10/13690)
Supplement: s1 [file s1]

*Supplementary Information*

# Open Space Evaluation Methodology and Three Dimensional Evaluation Model as a Base for Sustainable Development Tracking. *Sustainability* 2015, 7, 13690-13712

**Melita Rozman Cafuta**

University of Maribor, Faculty of Civil Engineering, Transportation Engineering and Architecture,  
Smetanova ulica 17, Maribor 2000, Slovenia

E-Mail: melita.rozman-cafuta@um.si

## The Questionnaire

**LOC-1 (DAY):** Imagine that you are at the displayed place.

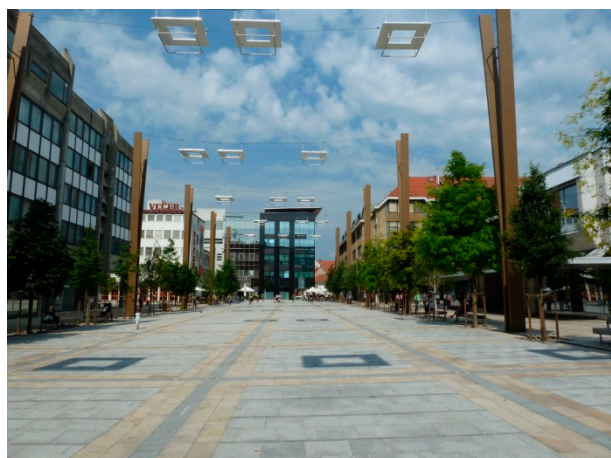

**LOC-1 (DAY):** Evaluate the scene.

Circle the score between the two extreme terms that most closely matches your opinion.

|                |   |   |   |   |   |             |
|----------------|---|---|---|---|---|-------------|
| not attractive | 1 | 2 | 3 | 4 | 5 | attractive  |
| unpleasant     | 1 | 2 | 3 | 4 | 5 | pleasant    |
| tense          | 1 | 2 | 3 | 4 | 5 | relaxed     |
| simple         | 1 | 2 | 3 | 4 | 5 | complex     |
| boring         | 1 | 2 | 3 | 4 | 5 | interesting |
| not arousing   | 1 | 2 | 3 | 4 | 5 | arousing    |
| not visible    | 1 | 2 | 3 | 4 | 5 | visible     |
| dangerous      | 1 | 2 | 3 | 4 | 5 | safe        |
| disordered     | 1 | 2 | 3 | 4 | 5 | ordered     |

**LOC-1 (NIGHT):** Imagine that you are at the displayed place.

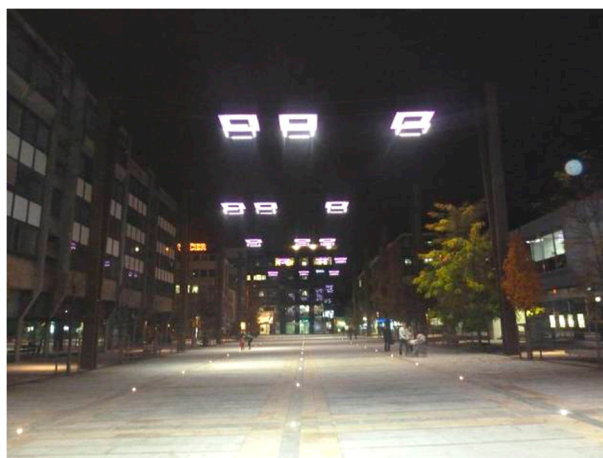

**LOC-1 (NIGHT):** Evaluate the scene.

Circle the score between the two extreme terms that most closely matches your opinion.

|                |   |   |   |   |   |             |
|----------------|---|---|---|---|---|-------------|
| not attractive | 1 | 2 | 3 | 4 | 5 | attractive  |
| unpleasant     | 1 | 2 | 3 | 4 | 5 | pleasant    |
| tense          | 1 | 2 | 3 | 4 | 5 | relaxed     |
| simple         | 1 | 2 | 3 | 4 | 5 | complex     |
| boring         | 1 | 2 | 3 | 4 | 5 | interesting |
| not arousing   | 1 | 2 | 3 | 4 | 5 | arousing    |
| not visible    | 1 | 2 | 3 | 4 | 5 | transparent |
| dangerous      | 1 | 2 | 3 | 4 | 5 | safe        |
| disordered     | 1 | 2 | 3 | 4 | 5 | ordered     |

**LOC-1 (DAY): What stands out the most on displayed place?** (circle the letter before answer)

- a) object line
- b) single object
- b) open space
- c) paved surfaces
- d) greenery

**LOC-1 (DAY): Evaluate the suitability of venues for these activities.**

Circle the appropriate assessment of 1- extremely inappropriate to 5—very appropriate.

|                        | extremely inappropriate |   |   | very appropriate |   |  |
|------------------------|-------------------------|---|---|------------------|---|--|
|                        | 1                       | 2 | 3 | 4                | 5 |  |
| walking                |                         |   |   |                  |   |  |
| short stop             |                         |   |   |                  |   |  |
| sitting                |                         |   |   |                  |   |  |
| socializing            |                         |   |   |                  |   |  |
| playing                |                         |   |   |                  |   |  |
| cycling                |                         |   |   |                  |   |  |
| rollerblading, skating |                         |   |   |                  |   |  |
| sightseeing tour       |                         |   |   |                  |   |  |

**LOC-1 (NIGHT): What stands out the most on displayed place?** (circle the letter before answer)

- a) object line
- b) single object
- b) open space
- c) paved surfaces
- d) greenery

**LOC-1 (NIGHT): Evaluate the suitability of venues for these activities.**

Circle the appropriate assessment of 1- extremely inappropriate to 5—very appropriate.

|                        | extremely inappropriate |   |   | very appropriate |   |  |
|------------------------|-------------------------|---|---|------------------|---|--|
|                        | 1                       | 2 | 3 | 4                | 5 |  |
| walking                |                         |   |   |                  |   |  |
| short stop             |                         |   |   |                  |   |  |
| sitting                |                         |   |   |                  |   |  |
| socializing            |                         |   |   |                  |   |  |
| playing                |                         |   |   |                  |   |  |
| cycling                |                         |   |   |                  |   |  |
| rollerblading, skating |                         |   |   |                  |   |  |
| sightseeing tour       |                         |   |   |                  |   |  |

**LOC-1 (NIGHT): Evaluate light effect?**

Circle the score between the two extreme terms that most closely matches your opinion.

|                 |   |   |   |   |   |               |
|-----------------|---|---|---|---|---|---------------|
| unpleasant glow | 1 | 2 | 3 | 4 | 5 | pleasant glow |
| uninteresting   | 1 | 2 | 3 | 4 | 5 | interesting   |
| incompatible    | 1 | 2 | 3 | 4 | 5 | compatible    |

**LOC-2 (DAY): Imagine that you are at the displayed place.**

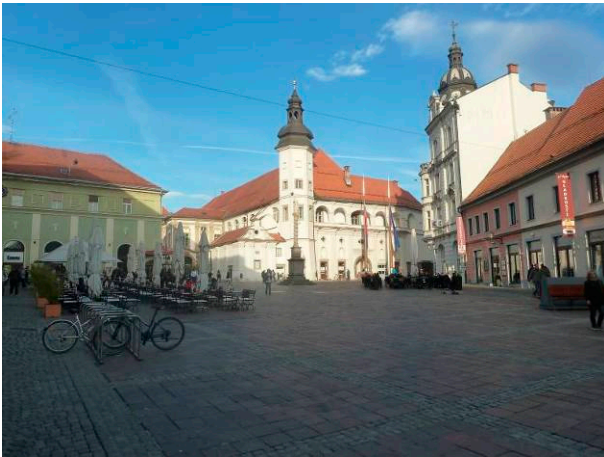

**LOC-2 (DAY): Evaluate the scene.**

Circle the score between the two extreme terms that most closely matches your opinion.

|                |   |   |   |   |   |             |
|----------------|---|---|---|---|---|-------------|
| not attractive | 1 | 2 | 3 | 4 | 5 | attractive  |
| unpleasant     | 1 | 2 | 3 | 4 | 5 | pleasant    |
| tense          | 1 | 2 | 3 | 4 | 5 | released    |
| simple         | 1 | 2 | 3 | 4 | 5 | complex     |
| boring         | 1 | 2 | 3 | 4 | 5 | interesting |
| not arousing   | 1 | 2 | 3 | 4 | 5 | arousing    |
| not visible    | 1 | 2 | 3 | 4 | 5 | visible     |
| dangerous      | 1 | 2 | 3 | 4 | 5 | safe        |
| disordered     | 1 | 2 | 3 | 4 | 5 | ordered     |

**LOC-2 (NIGHT): Imagine that you are at the displayed place.**

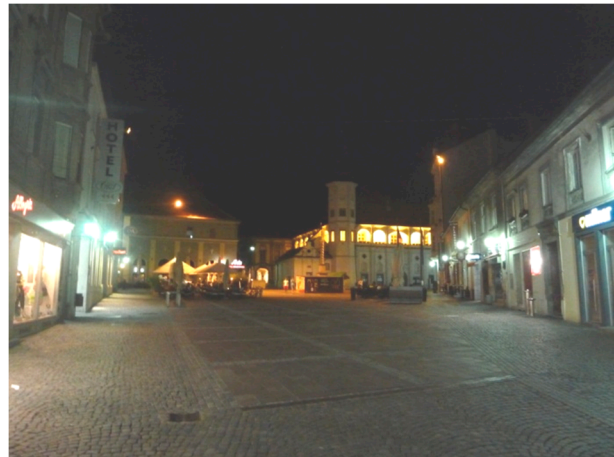

**LOC-2 (NIGHT): Evaluate the scene.**

Circle the score between the two extreme terms that most closely matches your opinion.

|                |   |   |   |   |   |             |
|----------------|---|---|---|---|---|-------------|
| not attractive | 1 | 2 | 3 | 4 | 5 | attractive  |
| unpleasant     | 1 | 2 | 3 | 4 | 5 | pleasant    |
| tense          | 1 | 2 | 3 | 4 | 5 | released    |
| simple         | 1 | 2 | 3 | 4 | 5 | complex     |
| boring         | 1 | 2 | 3 | 4 | 5 | interesting |
| not arousing   | 1 | 2 | 3 | 4 | 5 | arousing    |
| not visible    | 1 | 2 | 3 | 4 | 5 | visible     |
| dangerous      | 1 | 2 | 3 | 4 | 5 | safe        |
| disordered     | 1 | 2 | 3 | 4 | 5 | ordered     |

**LOC-2 (DAY): What stands out the most on displayed place?** (Circle the letter before answer)

- a) object line
- b) single object
- b) open space
- c) paved surfaces
- d) greenery

**LOC-2 (DAY): Evaluate the suitability of venues for these activities.**

Circle the appropriate assessment of 1- extremely inappropriate to 5—very appropriate.

|                        | extremely<br>inappropriate |   |   | very<br>appropriate |   |
|------------------------|----------------------------|---|---|---------------------|---|
|                        | 1                          | 2 | 3 | 4                   | 5 |
| walking                |                            |   |   |                     |   |
| short stop             |                            |   |   |                     |   |
| sitting                |                            |   |   |                     |   |
| socializing            |                            |   |   |                     |   |
| playing                |                            |   |   |                     |   |
| cycling                |                            |   |   |                     |   |
| rollerblading, skating |                            |   |   |                     |   |
| sightseeing tour       |                            |   |   |                     |   |

**LOC-2 (NIGHT): What stands out the most on displayed place?** (Circle the letter before answer)

- a) object line
- b) single object
- b) open space
- c) paved surfaces
- d) greenery

**LOC-2 (NIGHT): Evaluate the suitability of venues for these activities.**

Circle the appropriate assessment of 1- extremely inappropriate to 5—very appropriate.

|                        | extremely<br>inappropriate |   |   | very<br>appropriate |   |
|------------------------|----------------------------|---|---|---------------------|---|
|                        | 1                          | 2 | 3 | 4                   | 5 |
| walking                |                            |   |   |                     |   |
| short stop             |                            |   |   |                     |   |
| sitting                |                            |   |   |                     |   |
| socializing            |                            |   |   |                     |   |
| playing                |                            |   |   |                     |   |
| cycling                |                            |   |   |                     |   |
| rollerblading, skating |                            |   |   |                     |   |
| sightseeing tour       |                            |   |   |                     |   |

**LOC-2 (NIGHT): Evaluate light effect?**

Circle the score between the two extreme terms that most closely matches your opinion.

|                 |   |   |   |   |   |               |
|-----------------|---|---|---|---|---|---------------|
| unpleasant glow | 1 | 2 | 3 | 4 | 5 | pleasant glow |
| uninteresting   | 1 | 2 | 3 | 4 | 5 | interesting   |
| incompatible    | 1 | 2 | 3 | 4 | 5 | compatible    |
